# Supplementary material for: Effective injury forecasting in soccer with GPS training data and machine learning
Source: PLoS One. 2018 Jul 25;13(7):e0201264. doi: 10.1371/journal.pone.0201264 (PMC6059460; doi:10.1371/journal.pone.0201264)
Supplement: S2 Table — We report precision (prec), recall (rec), F1-score (F1) and Area Under the Curve (AUC) for the injury class and the non- injury class for all the predictors based on ACWR and MSWR. We also provide predictive performance of four baseline predictors B1, B2, B3 and B4. (DOCX) [file pone.0201264.s011.docx]

| **ACWR** | **class** | **prec** | **rec** | **F1** | **AUC** |
| --- | --- | --- | --- | --- | --- |
| C*d*TOT | 0 | 0.99 | 0.44 | 0.61 | 0.65 |
| 1 | 0.03 | 0.86 | 0.06 |
| C*d*HSR | 0 | 0.99 | 0.37 | 0.54 | 0.57 |
| 1 | 0.03 | 0.76 | 0.05 |
| C*d*MET | 0 | 0.99 | 0.43 | 0.60 | 0.59 |
| 1 | 0.03 | 0.76 | 0.06 |
| C*d*HML | 0 | 0.99 | 0.43 | 0.60 | 0.60 |
| 1 | 0.03 | 0.76 | 0.06 |
| C*d*HML*/m* | 0 | 0.99 | 0.39 | 0.56 | 0.60 |
| 1 | 0.03 | 0.81 | 0.06 |
| C*d*EXP | 0 | 1.00 | 0.43 | 0.60 | 0.67 |
| 1 | 0.04 | 0.91 | 0.07 |
| C*Acc*2 | 0 | 0.99 | 0.47 | 0.64 | 0.64 |
| 1 | 0.03 | 0.80 | 0.06 |
| C*Acc*3 | 0 | 0.99 | 0.45 | 0.64 | 0.58 |
| 1 | 0.03 | 0.71 | 0.06 |
| C*Dec*2 | 0 | 0.99 | 0.46 | 0.63 | 0.66 |
| 1 | 0.04 | 0.86 | 0.07 |
| C*Dec*3 | 0 | 0.99 | 0.46 | 0.63 | 0.66 |
| 1 | 0.04 | 0.86 | 0.07 |
| CDSL | 0 | 1.00 | 0.42 | 0.60 | 0.66 |
| 1 | 0.03 | 0.90 | 0.07 |
| CFI | 0 | 0.98 | 0.47 | 0.64 | 0.55 |
| 1 | 0.03 | 0.62 | 0.05 |
| Cone | 0 | 1.00 | 0.09 | 0.17 | 0.54 |
| 1 | 0.02 | 1.00 | 0.05 |
| Cvote | 0 | 0.99 | 0.83 | 0.90 | 0.65 |
| 1 | 0.06 | 0.48 | 0.11 |
| Call | 0 | 0.98 | 0.82 | 0.90 | 0.58 |
| 1 | 0.04 | 0.33 | 0.07 |
| *B*1 | 0 | 0.98 | 0.98 | 0.98 | 0.51 |
| 1 | 0.06 | 0.05 | 0.05 |
| *B*2 | 0 | 0.98 | 1.00 | 0.99 | 0.50 |
| 1 | 0.00 | 0.00 | 0.00 |
| *B*3 | 0 | 0.00 | 0.00 | 0.00 | 0.50 |
| 1 | 0.02 | 1.00 | 0.04 |
| *B*4 | 0 | 0.98 | 0.77 | 0.86 | 0.60 |
| 1 | 0.04 | 0.43 | 0.07 |
